# Supplementary material
Source: publisher site journal article supplement (https://www.dovepress.com/article/563718)
Supplement: Supplementary file 1 [file Supplementary%20Material.docx]

**Global trends in COPD Self-management research: a dual-perspective bibliometric analysis(2005 to July 1, 2025)**

**Xingyu Huang1,Jiacai Feng1,Xiaoting Gan1,Rongqing Wu1,Cui Su1,Luxiong Zheng1,Renli Deng1***

****S1 Text. Detailed Methodology for Author Analysis and Identification of Core Authors****

This section provides a comprehensive explanation of the bibliometric laws and calculations used to identify core authors in the field of COPD self-management, as referenced in Section 1 of the main text (where the core author network was initially described).

****S1.1 Analytical Framework and Rationale****

This study adopts a quantitative paradigm to analyze the research landscape and define the distribution of academic productivity among researchers, with its primary goal of empirically identifying the key contributors shaping this field.Lotka's Law[S1], which was initially proposed by the American scholar Alfred J. Lotka in the 1920s{Mittermeir, 2007 #70}, is employed as a foundational analytical framework. This law enables the precise delineation of high - yield research cohorts and their seminal contributions within the realm of COPD self - management[S2].

Sum[n(x)] from x = (m+1) to n_max = sqrt(N)

(n(x) = number of authors with x publications; N = total number of authors; m = minimum publication threshold for core authors; n_max = maximum publication count by the most prolific author)

****S1.2 Application of Lotka's and Price's Laws****

The distribution of author productivity in our dataset was consistent with the inverse-square principle.first-time contributors (i.e., authors with only one publication) accounted for 60% of the total author pool. Let n(x) denote the number of authors with x publications, where n_max represents the maximum publication count by the most prolific author in this field (as derived from VOSviewer bibliometric analysis, n_max = 26. Here, N denotes the total number of authors, while m defines the minimum publication threshold for core authors.According to Price’s Law, the minimum output (m) required for an author to be classified as a core contributor in a given field is given by:

m = 0.749 × sqrt(n_max)

(n_max = 26, the maximum number of publications by the most prolific author; m = minimum publication threshold for core authors)

Thus, authors with ≥4 publications were designated as core authors. Our analysis identified 76 core authors, collectively contributing 429 publications, which aligns with Price’s criterion that core authors should account for > 50% of total publications[S3]. Empirical validation confirmed close agreement with theoretical predictions, indicating the establishment of a stable core author network in COPD self-management research.

**References in Supplementary Materials：**

[S1]Mittermeir R, Knorr KD. Scientific productivity and accumulative advantage: a thesis reassessed in the light of international data. *R&D Management*. 2007;9(s1):235–239. doi:10.1111/j.1467-9310.1979.tb01302.x

[S2]Coile RC. Lotka's frequency distribution of scientific productivity. *Journal of the American Society for Information Science*. 2007;28(6):366–370. doi:10.1002/asi.4630280610

[S3]Bornmann L, Mutz R. Growth rates of modern science: A bibliometric analysis based on the number of publications and cited references. *Journal of the Association for Information Science and Technology*. Nov 2015;66(11):2215–2222. doi:10.1002/asi.23329
